# Supplementary material
Source: publisher figshare collection journal article supplement (https://tandf.figshare.com/articles/dataset/_/2889622)
Supplement: Supplementary file 1 [file 1]

Archive with 2 entries (2 files):
- Figure S2.pdf
- Figure S1.pdf
