# Supplementary material
Source: publisher figshare collection journal article supplement (https://tandf.figshare.com/articles/dataset/_/2889622)
Supplement: Supplementary file 1 [file 1 › Figure S1.pdf]

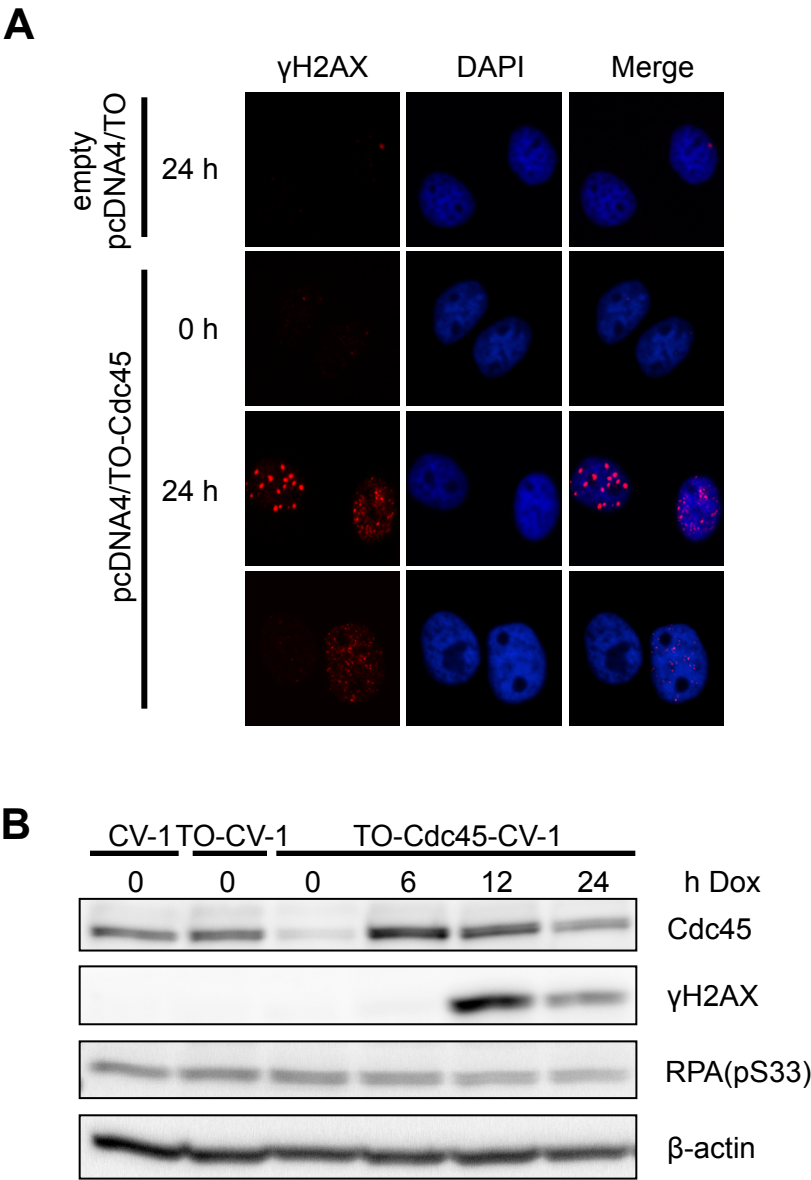

**Suppl. Fig 1. Cdc45 overexpression leads to H2AX phosphorylation.** Green monkey kidney epithelial CV-1 cells were stably transfected with pcDNA4/TO control vector or pcDNA4/TO-Cdc45 expressing HA-tagged human Cdc45 under the control of a tetracycline-inducible promoter. **(A)** Indirect immunofluorescence microscopy for  $\gamma$ H2AX after induction of expression with 1  $\mu$ g/ml doxycycline for the indicated times. Images were acquired with an Axio Imager Z1 Apotome and the Axiovision software (Carl Zeiss, Jena, Germany). **(B)** Western analysis of cell extracts collected from cells cultured in parallel as indicated above.
