# Supplementary material
Source: publisher figshare collection journal article supplement (https://tandf.figshare.com/articles/dataset/_/2889622)
Supplement: Supplementary file 1 [file 1 › Figure S2.pdf]

# Suppl. Fig. 2

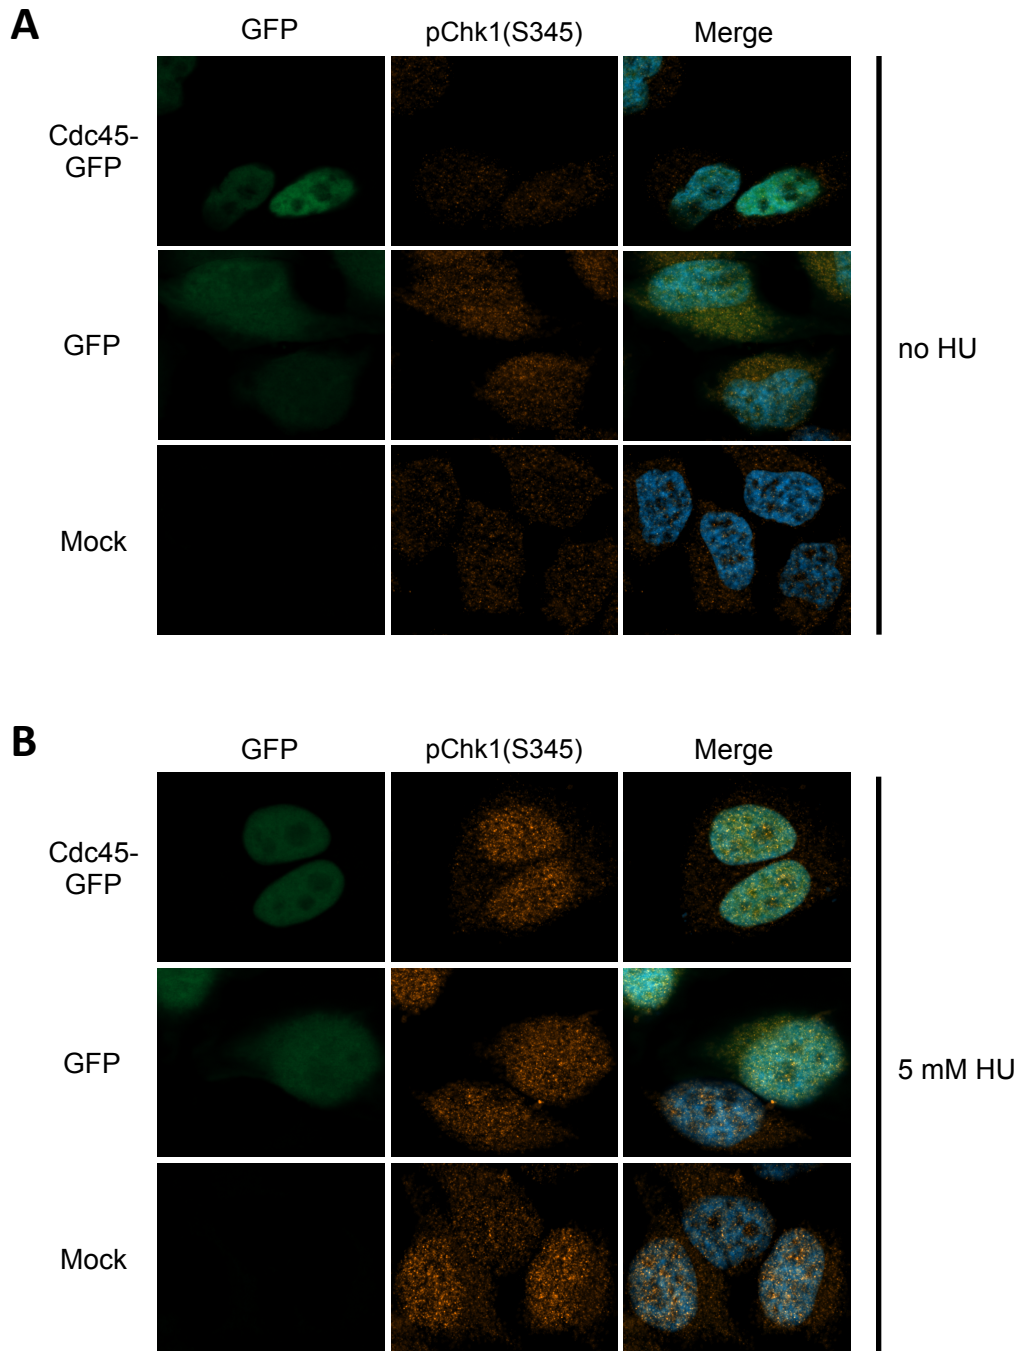

**Suppl. Fig 2. Cdc45 overexpression does not prevent Chk1 phosphorylation at serine 345 after hydroxyurea-induced checkpoint activation.** Human HeLa cells were transiently transfected with a vector expressing Cdc45-GFP or GFP alone, or mock-transfected. One day after transfection, cells were harvested (A) before and (B) after treatment with 5 mM hydroxyurea for one hour, fixed with *para*-formaldehyde and processed for indirect immunofluorescence microscopy for phospho-Chk1(Ser345) (orange). Images were acquired at 630x magnification with an Axio Imager Z1 Apotome and the ZEN2 software (Carl Zeiss, Jena, Germany).
